# Supplementary material for: Boosting Magnetoelectric Effect in Polymer-Based Nanocomposites
Source: MDPI journal article supplement (doi:10.3390/nano11051154), 2021-04-28
Supplement: s1 [file s1]

# Boosting Magnetoelectric Effect in Polymer-Based Nanocomposites

Alexander Omelyanchik <sup>1,2</sup>, Valentina Antipova <sup>1</sup>, Christina Gritsenko <sup>1</sup>, Valeria Kolesnikova <sup>1</sup>, Dmitry Murzin <sup>1</sup>, Yilin Han <sup>3</sup>, Andrei V. Turutin <sup>4,5</sup>, Ilya V. Kubasov <sup>4</sup>, Alexander M. Kislyuk <sup>4</sup>, Tatiana S. Ilina <sup>4</sup>, Dmitry A. Kiselev <sup>4</sup>, Marina I. Voronova <sup>4</sup>, Mikhail D. Malinkovich <sup>4</sup>, Yuriy N. Parkhomenko <sup>4</sup>, Maxim Silibin <sup>6,7,8</sup>, Elena N. Kozlova <sup>3</sup>, Davide Peddis <sup>2,9</sup>, Kateryna Levada <sup>1</sup>, Liudmila Makarova <sup>1,10</sup>, Abdulkarim Amirov <sup>1,11,\*</sup> and Valeria Rodionova <sup>1,\*</sup>

<sup>1</sup> REC Smart Materials and Biomedical Applications, Immanuel Kant Baltic Federal University, 236041 Kaliningrad, Russia; asomelyanchik@kantiana.ru (A.O.); vantipova1@kantiana.ru (V.A.); christina.byrka@gmail.com (C.G.); vgkolesnikova1@kantiana.ru (V.K.); dvmurzin@yandex.ru (D.M.); elevada@kantiana.ru (K.L.); la.loginova@physics.msu.ru (L.M.)

<sup>2</sup> Department of Chemistry and Industrial Chemistry (DCIC), University of Genova, 16146 Genova, Italy; davide.peddis@unige.it

<sup>3</sup> Biomedical Centre, Department of Neuroscience, Uppsala University, 751 24 Uppsala, Sweden; yilin.han@neuro.uu.se (Y.H.); elena.kozlova@neuro.uu.se (E.N.K.)

<sup>4</sup> Laboratory of Physics of Oxide Ferroelectrics and Department of Materials Science of Semiconductors and Dielectrics, National University of Science and Technology MISiS, 119049 Moscow, Russia; aturutin92@gmail.com (A.V.T.); kubasov.ilya@gmail.com (I.V.K.); akislyuk94@gmail.com (A.M.K.); ilina.tatiana@gmail.com (T.S.I.); dm.kiselev@gmail.com (D.A.K.); mvoron@bk.ru (M.I.V.); malinkovich@yandex.ru (M.D.M.); parkh@rambler.ru (Y.N.P.)

<sup>5</sup> Department of Physics and I3N, University of Aveiro, 3810-193 Aveiro, Portugal

<sup>6</sup> Institute of Advanced Materials and Technologies, National Research University of Electronic Technology "MIET", 124498 Moscow, Russia; sil\_m@mail.ru

<sup>7</sup> Institute for Bionic Technologies and Engineering, I.M. Sechenov First Moscow State Medical University, 119991 Moscow, Russia

<sup>8</sup> Scientific-Manufacturing Complex "Technological Centre" Shokin Square, House 1, Bld. 7, Zelenograd, 124498 Moscow, Russia

<sup>9</sup> Institute of Structure of Matter–CNR, Monterotondo Stazione, 00016 Rome, Italy

<sup>10</sup> Faculty of Physics, Lomonosov Moscow State University, 1-2 Leninskie Gory, 119234 Moscow, Russia

<sup>11</sup> Amirkhanov Institute of Physics of Dagestan Federal Research Center, Russian Academy of Sciences, Makhachkala 367003, Russia

\* Correspondence: amiroff\_a@mail.ru (A.A.); vvrodionova@kantiana.ru (V.R.)

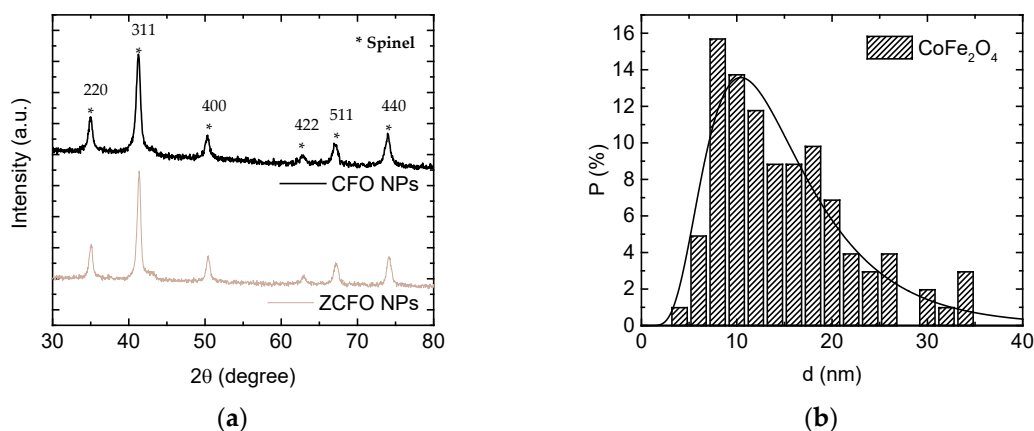

**Figure S1.** (a) XRD pattern of CoFe<sub>2</sub>O<sub>4</sub> and Zn<sub>0.25</sub>Co<sub>0.75</sub>Fe<sub>2</sub>O<sub>4</sub> NPs; (b) TEM micrograph and size distribution of CoFe<sub>2</sub>O<sub>4</sub> NPs.

Magnetic interparticle interactions were investigated by measuring the isothermal remanent magnetization (IRM) and the direct current demagnetization (DCD) [1,2].

$M_{\text{IRM}}(H)$  was measured on the demagnetized sample applying a set of increasing fields (up to 10 kOe), removing them and recording the remanent magnetization after each iteration.  $M_{\text{DCD}}(H)$  was measured saturating first the sample, applying a set of increasing reverse fields and recording the remanent magnetization after each iteration. According to the Stoner–Wohlfarth model for an assembly of non-interacting randomly oriented MNPs with uniaxial anisotropy the two remanent magnetization curves are correlated by the following equation:  $M_{\text{DCD}}(H) = 1 - 2 \cdot M_{\text{IRM}}(H)$ . The effect of interparticle interactions can be evaluated by the Kelly equation [3]:

$$\Delta M(H) = M_{\text{DCD}}(H) - 1 + 2 \cdot M_{\text{IRM}}(H) \quad (1)$$

where  $\Delta M$  allows one to estimate the level of interactions.  $\Delta M = 0$  for an ideal situation with the absence of interactions. A negative value indicates the predominance of dipolar interactions, whereas a positive value indicates the predominance of exchange interactions. CFO powder sample shows a negative deviation with the intensity of about  $\sim 0.1$  that suggests that in powder sample the interparticle dipolar interactions are dominant.

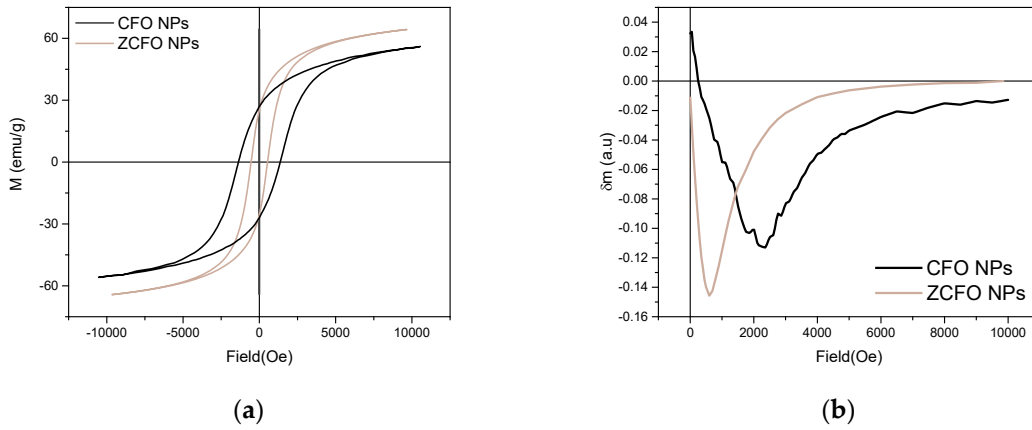

**Figure S2.** (a) Room temperature ( $\sim 300$  K) M-H loop (b)  $\Delta M$ -plot of  $\text{CoFe}_2\text{O}_4$  and  $\text{Zn}_{0.25}\text{Co}_{0.75}\text{Fe}_2\text{O}_4$  NPs in form of powder.

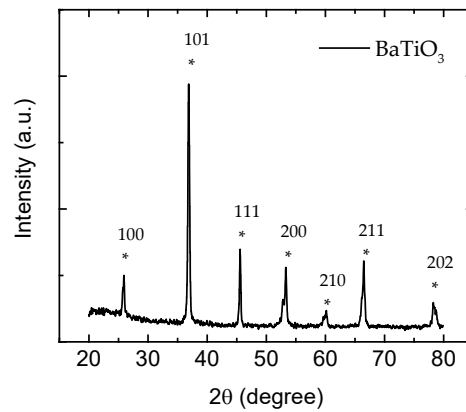

**Figure S3.** XRD pattern of  $\text{BaTiO}_3$  particles.

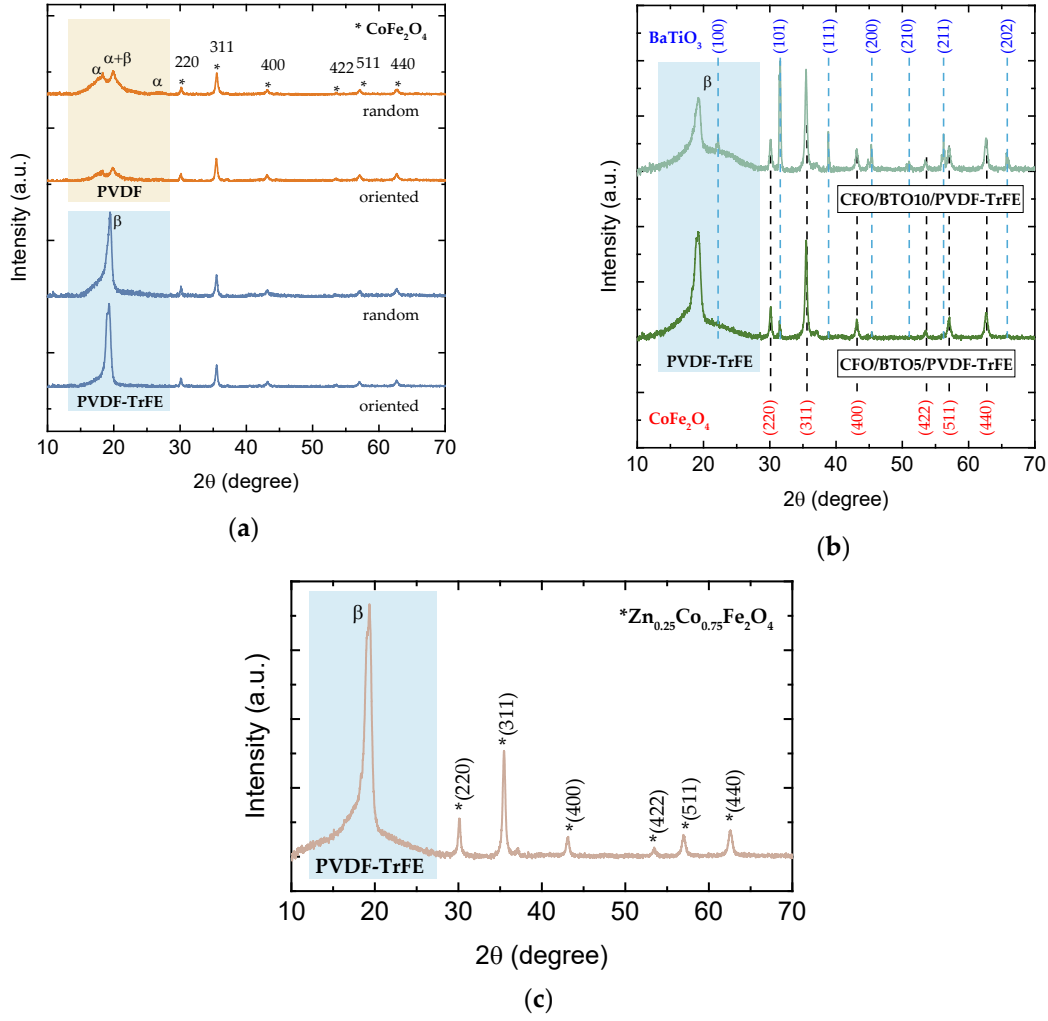

**Figure S4.** Comparison of XRD patterns for (a) random and oriented CFO/PVDF and CFO/PVDF-TrFE nanocomposites; (b) nanocomposites with 5 and 10% of  $\text{BaTiO}_3$  particles; (c) ZCFO/PVDF-TrFE nanocomposite.

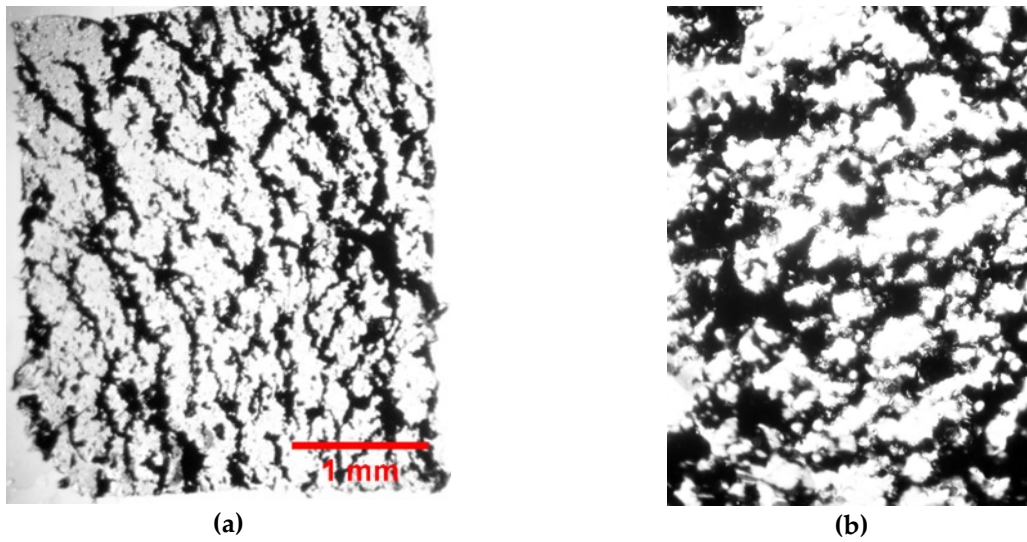

**Figure S5.** Optical images of aligned clusters of CFO NPs in (a) PVDF-TrFE and (b) PVDF polymers.

The pore depth was estimated using the WSxM software [4]. Pore depth histograms were plotted using flood functions. By choosing the function "Find holes", it is possible to display all points below a certain height. By default WSxM sets flooding images by using the

topography image and showing holes in different colours and holes with a height larger than the one selected here will neither be displayed nor considered during calculus. Next, a function was used to create a histogram of height. The maximum height histogram shows a histogram of the maximum value of the difference between the cutoff height and the point's height.

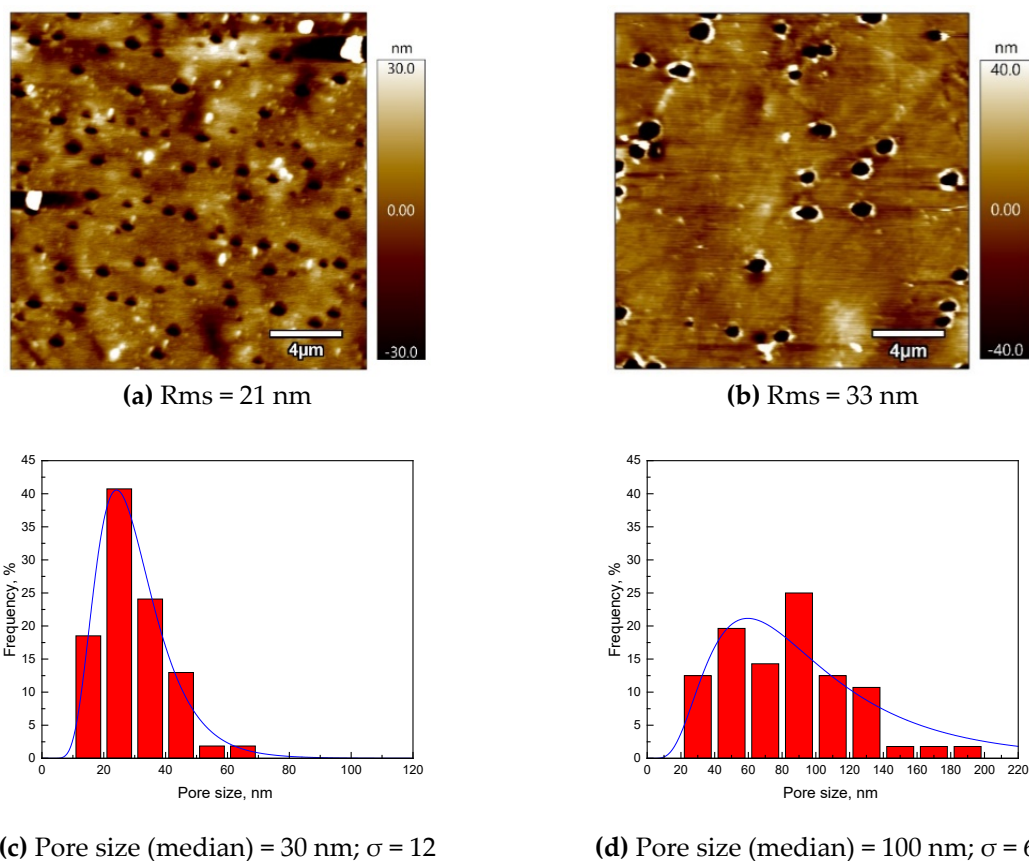

**Figure S6.** Atomic force microscopy (AFM) images of (a) PVDF-TrFE/CFO and (b) PVDF/CFO NCs; histograms of the pore depth distribution obtained using the WSxM program for (c) PVDF-TrFE/CFO and (d) PVDF/CFO NCs. The median value and standard deviation ( $\sigma$ ) of log-normal distribution are presented.

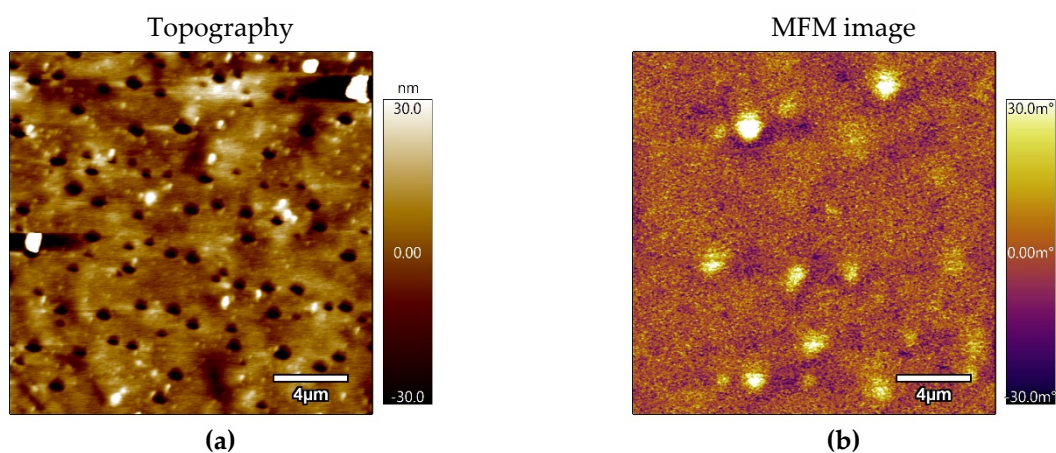

**Figure S7.** Magnetic force microscopy (MFM) images of PVDF-TrFE/CFO nanocomposite evaporated in the absence of magnetic field: (a) topology and (b) MFM signals.

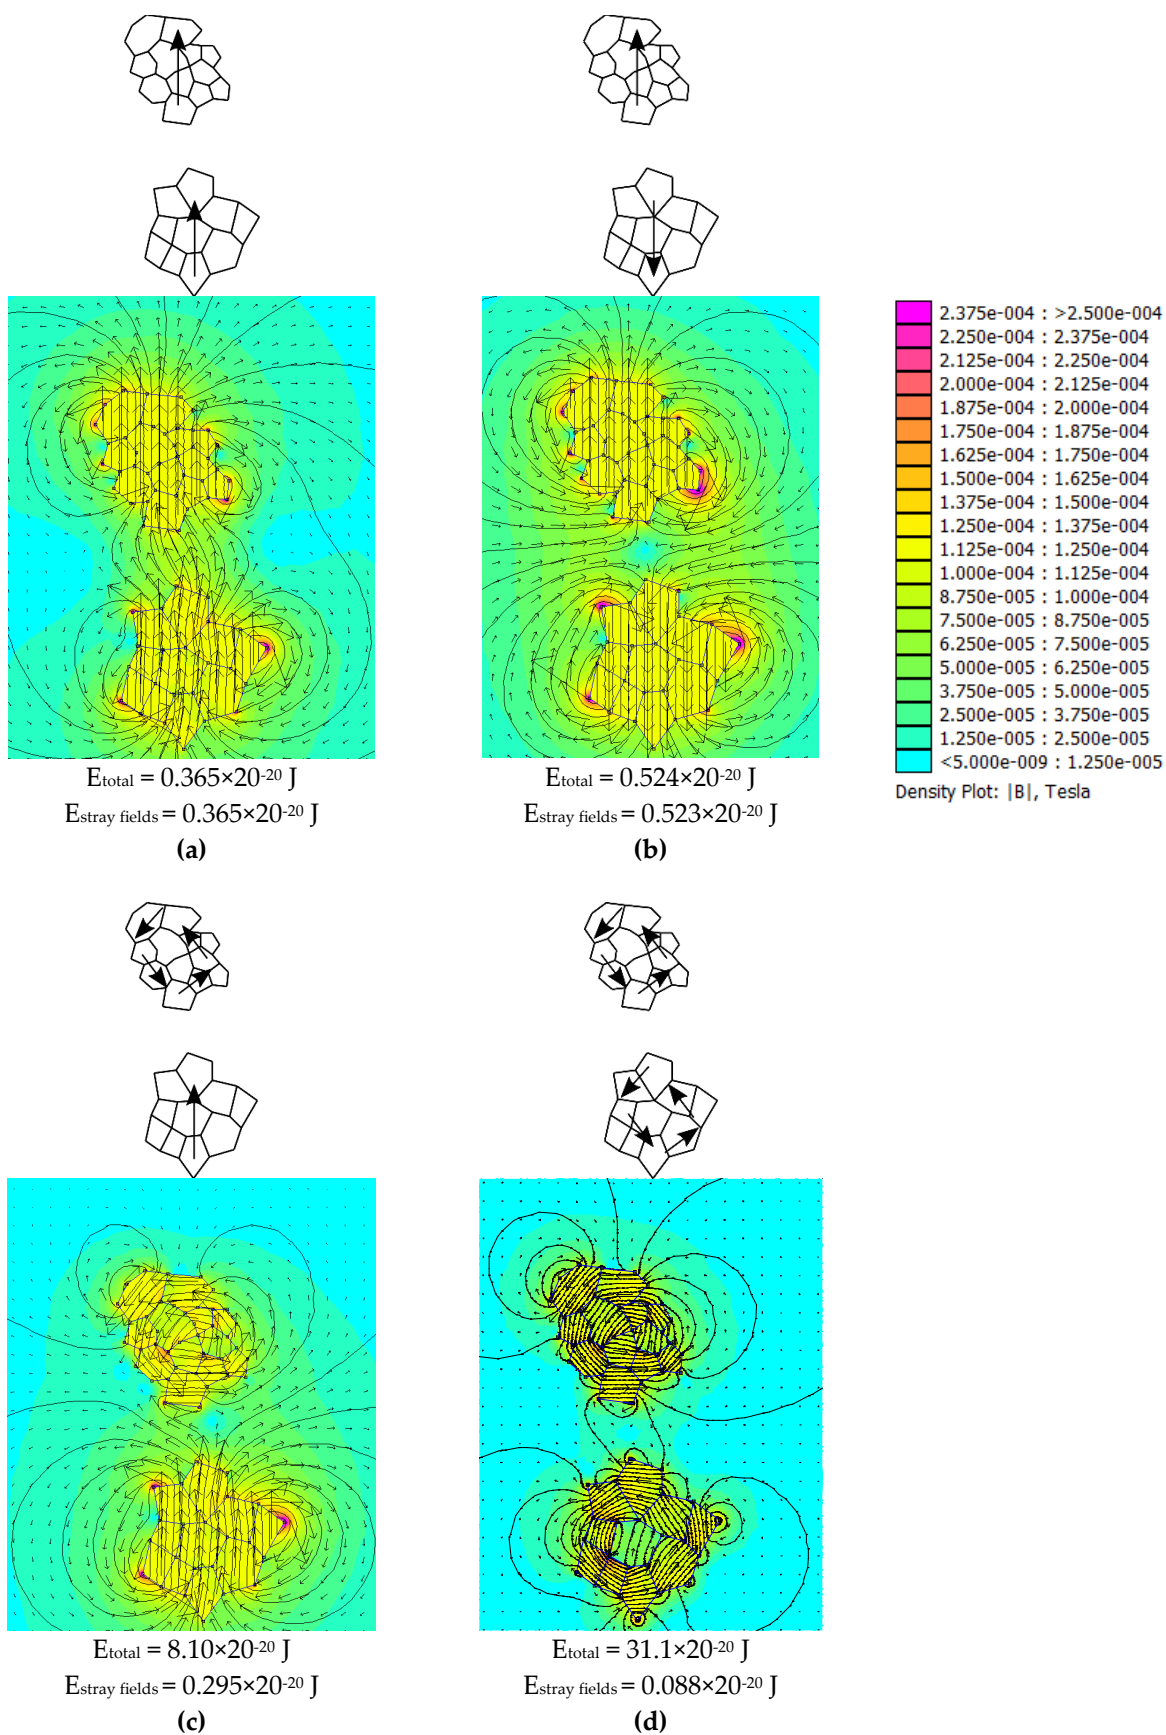

**Figure S8.** Results of FEMM simulation of magnetic induction (B) for different configurations of initial magnetization of particles aggregates: (a) "head-to-tail" magnetization state; (b) "head-to-head" magnetization state; (c) one aggregate has a close structure and the second is uniformly magnetized; (d) two aggregates have close structures.

## References

1. Peddis, D.; Jönsson, P.E.; Laureti, S.; Varvaro, G. Magnetic interactions: A tool to modify the magnetic properties of materials based on nanoparticles. In *Frontiers of Nanoscience*; Binns, C., Ed.; Elsevier B.V: Oxford, UK, 2014; Vol. 6, pp. 129–188 ISBN 9780080983530.
2. García-Otero, J.; Porto, M.; Rivas, J. Henkel plots of single-domain ferromagnetic particles. *J. Appl. Phys.* **2000**, *87*, 7376.
3. Kelly, P.E.; O'Grady, K.; Mayo, P.L.; Chantrell, R.W. Switching mechanisms in cobalt-phosphorus thin films. *IEEE Trans. Magn.* **1989**, *25*, 3881–3883.
4. Horcas, I.; Fernández, R.; Gómez-Rodríguez, J.M.; Colchero, J.; Gómez-Herrero, J.; Baro, A.M. WSXM: A software for scanning probe microscopy and a tool for nanotechnology. *Rev. Sci. Instrum.* **2007**.
